# Supplementary material
Source: PubMed Central journal article supplement (PMC6646273)
Supplement: ao8b01999_si_001.pdf [file ao8b01999_si_001.pdf]

# Enhanced Cancer Theranostics with Self-Assembled, Multi-labeled siRNAs

Stephen D. Kozuch<sup>1</sup>, Christopher N. Cultrara<sup>1</sup>, Adah E. Beck<sup>1</sup>, Claudia J. Heller<sup>1</sup>, Sunil Shah<sup>1</sup>,  
Mayurbhai R. Patel<sup>2</sup>, Jenny Zilberberg<sup>3†</sup> and David Sabatino<sup>1†\*</sup>

<sup>1</sup>Department of Chemistry and Biochemistry, Seton Hall University, South Orange, NJ 07079

<sup>2</sup>Nitto Denko AVECIA Inc, 8560 Reading Road, Cincinnati, OH 45215

<sup>3</sup>Department of Biomedical Research, Hackensack University Medical Center, Hackensack, NJ  
07601

\*Corresponding Author: David Sabatino: Email ID : [david.sabatino@shu.edu](mailto:david.sabatino@shu.edu)

Tel : +1-973-313-6359

† Jenny Zilberberg and David Sabatino contributed equally to this work.

## Supplementary Materials

Within this supporting information:

- |                                                                  |     |
|------------------------------------------------------------------|-----|
| 1) RNA characterization table                                    | S3  |
| 2) HPLC/ESI-MS traces of RNA sequences                           | S4  |
| 3) Ultraviolet-Visible spectroscopy of FITC-siRNA hybrids        | S23 |
| 4) Fluorescent microscopy images of FITC-V-shape siRNA 4 vs 24 h | S25 |
| 5) Cell viability determined by propidium iodide staining        | S26 |

| Name            | Sequence <sup>a</sup>                                                                                                   | Percent Yield (%) <sup>b</sup> | Percent Purity (%) <sup>c</sup> | Mass <sup>d</sup> |
|-----------------|-------------------------------------------------------------------------------------------------------------------------|--------------------------------|---------------------------------|-------------------|
| GRP78A1         | 5'-AUC AGA AUC UUC CAA CAC U-3'                                                                                         | 91                             | >99%                            | 5949.6 (5949.9)   |
| GRP78S1         | 5'-AGU GUU GGA AGA UUC UGA U-3'                                                                                         | 92                             | >99%                            | 6103.7 (6103.9)   |
| GRP94S1         | 5'-GAA GAA GCA UCU GAU UAC C-3'                                                                                         | 90                             | >99%                            | 6068.8 (6069.0)   |
| GRP75S1         | 5'-ACU GAC UCG GAG AAU ACA A-3'                                                                                         | 91                             | >99%                            | 6091.8 (6092.2)   |
| V-78A194A1      | 2'-3'-CUU CUU CGU AGA CUA CUG G-5'<br>rU<br>3'-5'-AUC AGA AUC UUC CAA CAC U-3'                                          | 83                             | >99%                            | 12929.7 (12929.9) |
| V-78A178A2      | 2'-3'-CCU CGC GUA AUC AUG AUC U-5'<br>rU<br>3'-5'-AUC AGA AUC UUC CAA CAC U-3'                                          | 81                             | >98%                            | 12275.4 (12276.6) |
| Y-78A194A175A1  | 2'-3'-CUU CUU CGU AGA CUA CUG G-5'<br>5'-UUG UA UCU CCG AGU CAG U-3'-5'-rU<br>3'-5'-AUC AGA AUC UUC CAA CAC U-3'        | 62                             | >98%                            | 18335.9 (18357.2) |
| FITC-78A1       | FITC-NH-(CH <sub>2</sub> ) <sub>6</sub> -5'-AUC AGA AUC UUC CAA CAC U-3'                                                | 52                             | >97%                            | 6516.7 (6518.5)   |
| FITC-78S1       | FITC-NH-(CH <sub>2</sub> ) <sub>6</sub> -5'-AGU GUU GGA AGA UUC UGA U-3'                                                | 48                             | >98%                            | 6670.8 (6672.5)   |
| FITC-94S1       | FITC-NH-(CH <sub>2</sub> ) <sub>6</sub> -5'-GAA GAA GCA UCU GAU UAC C-3'                                                | 51                             | >97%                            | 6635.9 (6636.8)   |
| FITC-75S1*      | FITC-NH-(CH <sub>2</sub> ) <sub>6</sub> -5'-ACU GAC UCG GAG AAU ACA A-3'                                                | N/A                            | >99%                            | 6629.3 (6628.8)   |
| FITC-V-78A194A1 | 2'-3'-CUU CUU CGU AGA CUA CUG G-5'-(CH <sub>2</sub> ) <sub>6</sub> -NH-FITC<br>rU<br>3'-5'-AUC AGA AUC UUC CAA CAC U-3' | 22                             | >95%                            | 13013.1 (12884.6) |
| FITC-V-78A178A2 | 2'-3'-CCU CGC GUA AUC AUG AUC U-5'-(CH <sub>2</sub> ) <sub>6</sub> -NH-FITC<br>rU<br>3'-5'-AUC AGA AUC UUC CAA CAC U-3' | 20                             | >95%                            | 12969.1 (12843.9) |

**Table S1.** <sup>a</sup>Linear, V- and Y-shaped RNA sequences designed to target GRP-78, 94 and 75. <sup>b</sup>Determined by UV-Vis Spectroscopy. <sup>c</sup>Obtained by RP-IP-HPLC using 0.1 mM TEAA in 0-45% MeCN, pH: 7.2 over 20 min. <sup>d</sup>Calculated mass (observed mass) by ESI-MS in negative mode (Novatia LLC, Newton, PA). \* Sample purchased from ChemGenes (Wilmington, MA)

**Figure S1** RP IP HPLC ANALYSIS OF LINEAR GRP78A1

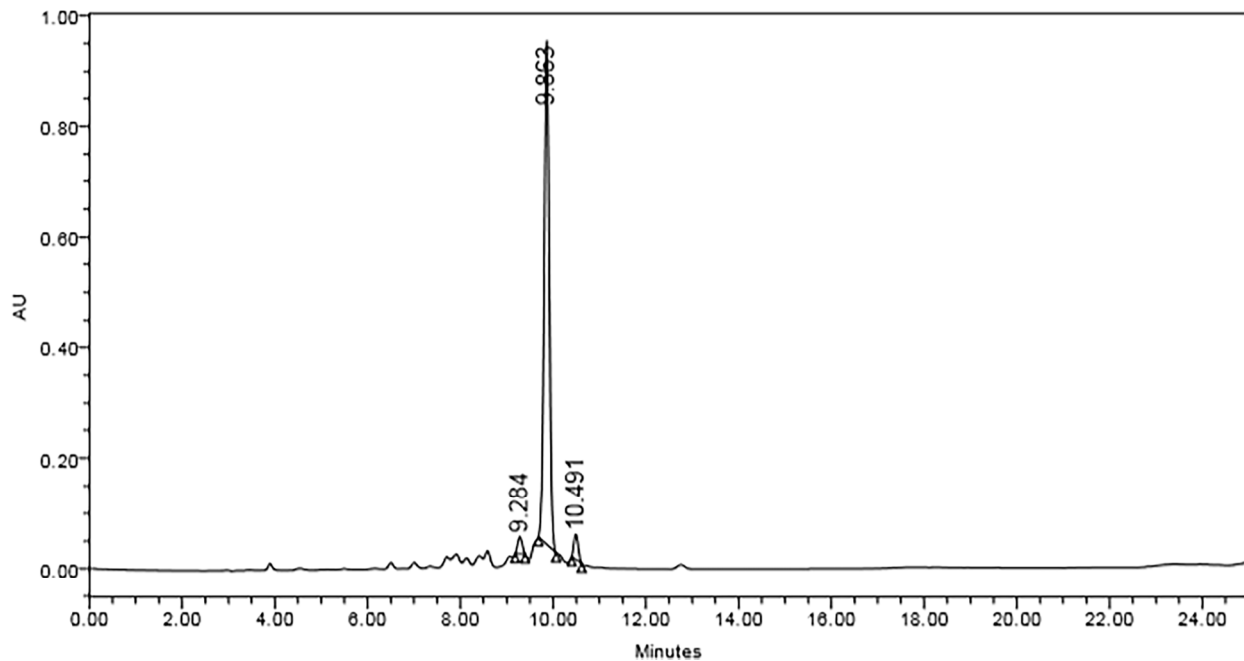

|   | RT    | % Area | Area<br>( $\mu\text{V}\cdot\text{sec}$ ) |
|---|-------|--------|------------------------------------------|
| 1 | 9.28  | 2.78   | 211473                                   |
| 2 | 9.86  | 93.29  | 7107854                                  |
| 3 | 10.49 | 3.93   | 299732                                   |

**Figure S2** RP IP HPLC ANALYSIS OF LINEAR GRP78S1

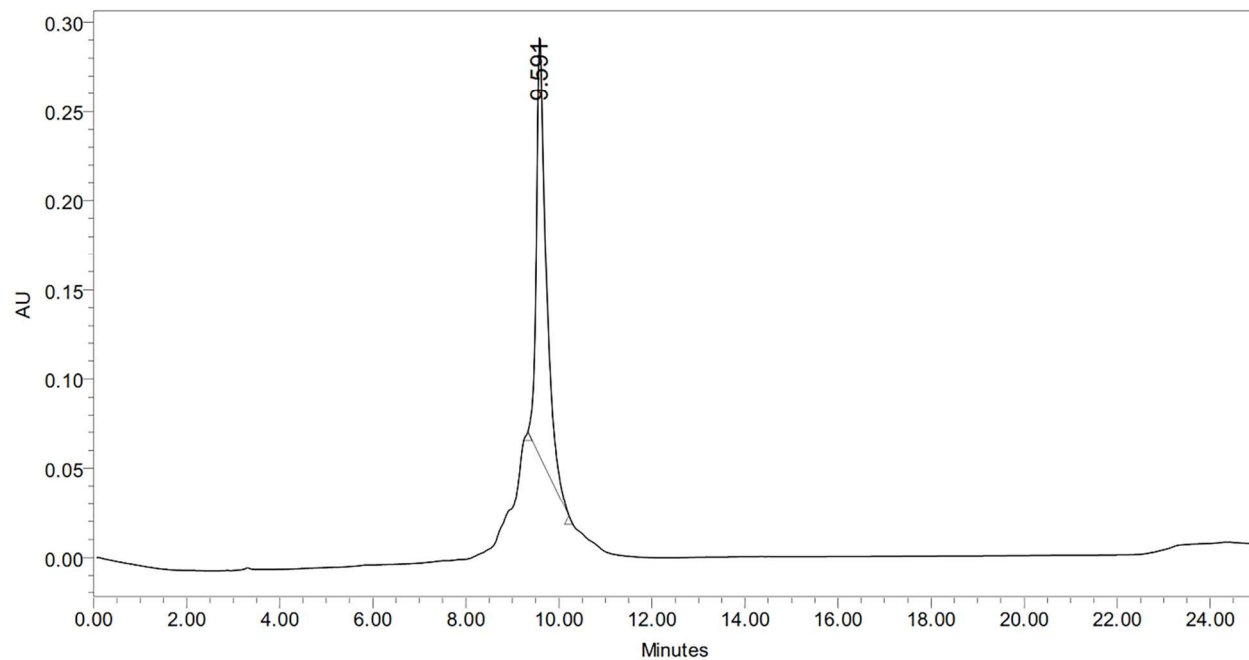

|   | RT   | % Area | Area<br>( $\mu\text{V}\cdot\text{sec}$ ) |
|---|------|--------|------------------------------------------|
| 1 | 9.59 | 100.00 | 3449874                                  |

**Figure S3** RP IP HPLC ANALYSIS OF LINEAR GRP94S1

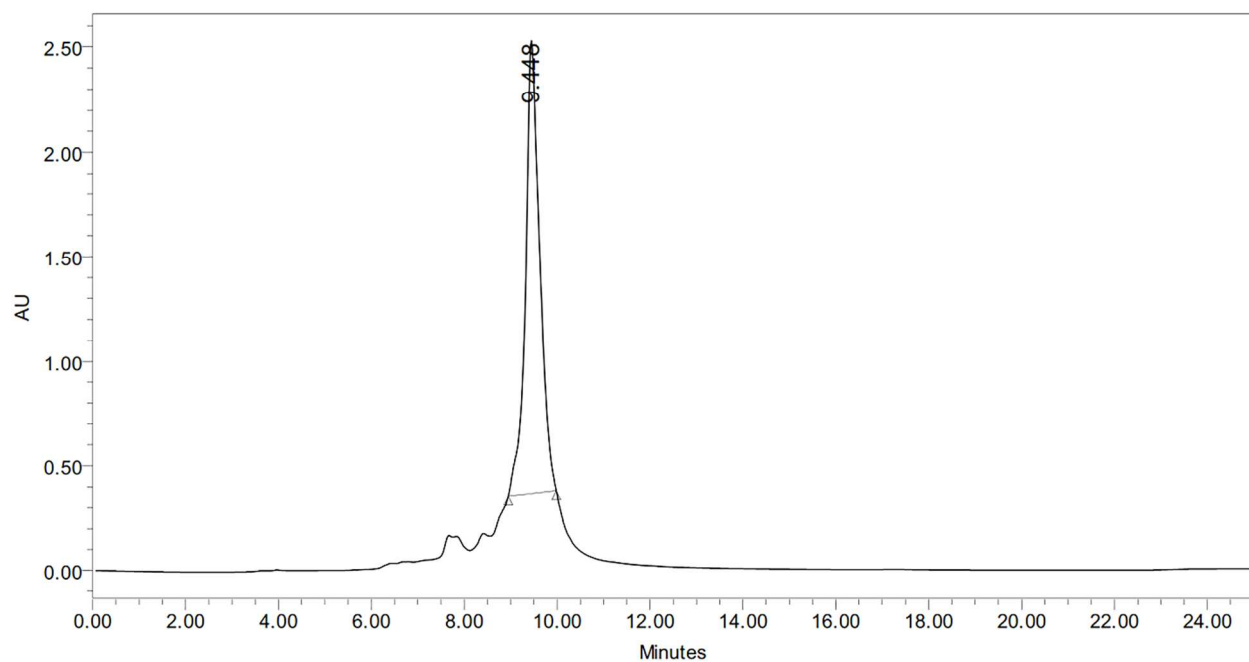

|   | RT   | % Area | Area<br>( $\mu\text{V}\cdot\text{sec}$ ) |
|---|------|--------|------------------------------------------|
| 1 | 9.45 | 100.00 | 45867536                                 |

**Figure S4** RP IP HPLC ANALYSIS OF V-GRP78A194A1

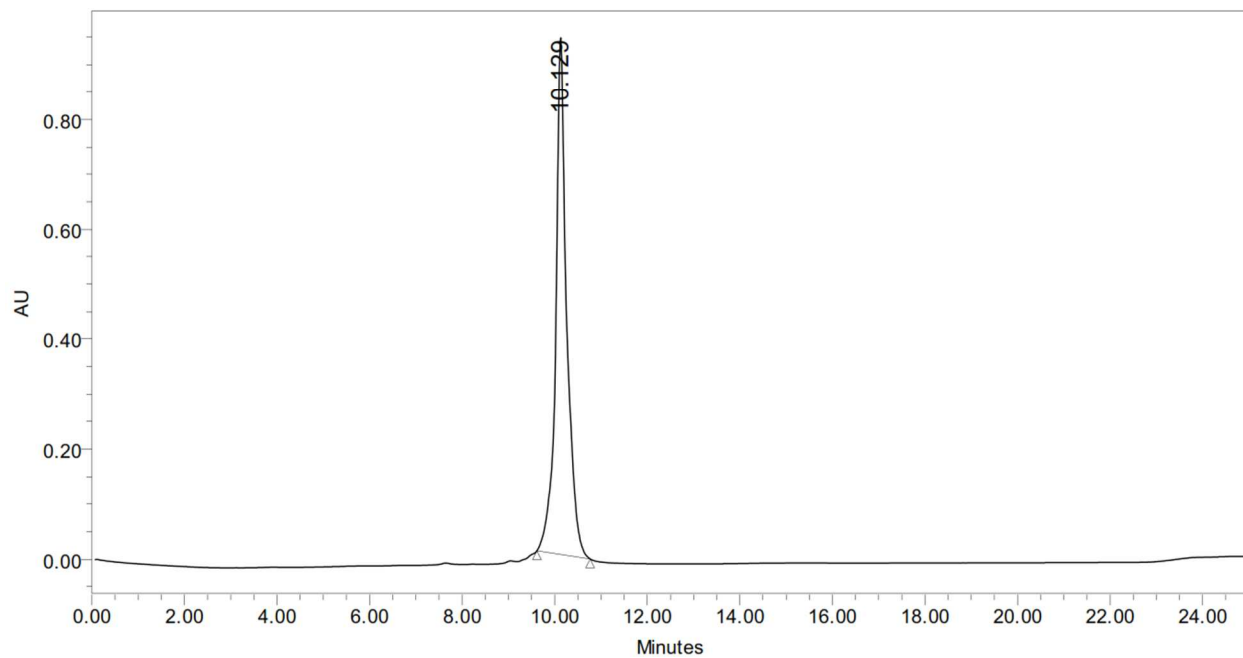

|   | RT    | % Area | Area<br>( $\mu\text{V}\cdot\text{sec}$ ) |
|---|-------|--------|------------------------------------------|
| 1 | 10.13 | 100.00 | 15461777                                 |

**Figure S5** RP IP HPLC ANALYSIS OF V-GRP78A178A2

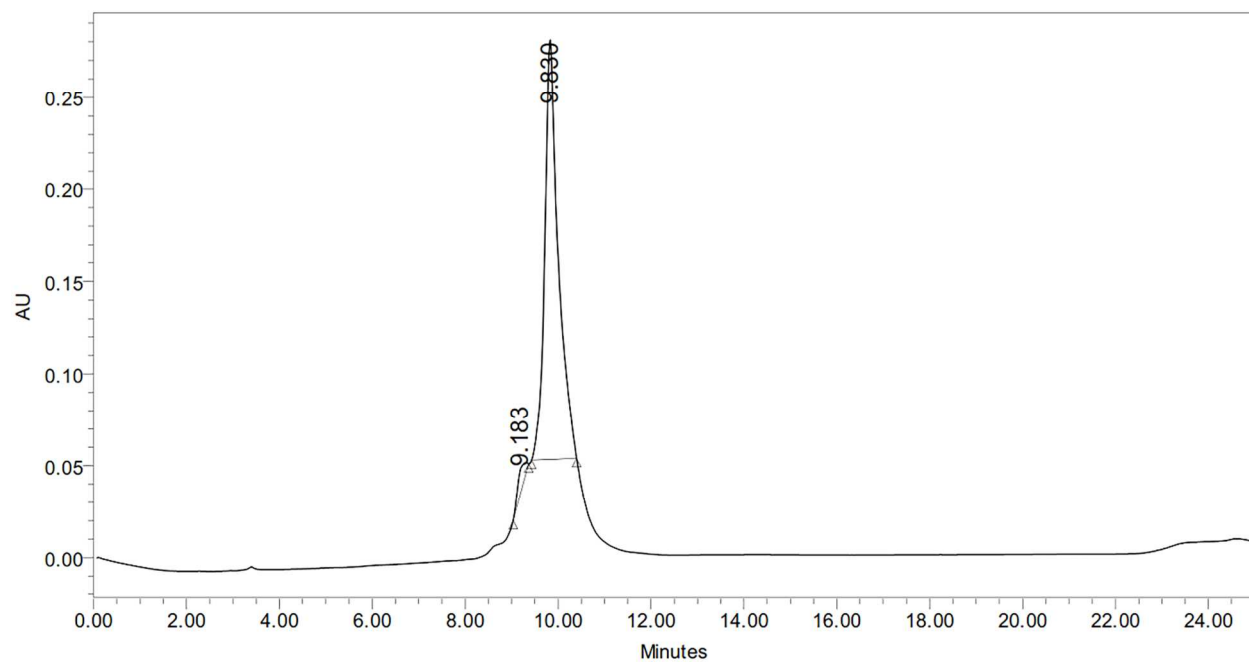

|   | RT   | % Area | Area<br>( $\mu\text{V} \cdot \text{sec}$ ) |
|---|------|--------|--------------------------------------------|
| 1 | 9.18 | 3.07   | 146735                                     |
| 2 | 9.83 | 96.93  | 4626292                                    |



**Figure S6** RP IP HPLC ANALYSIS OF Y-GRP78A194A175A1

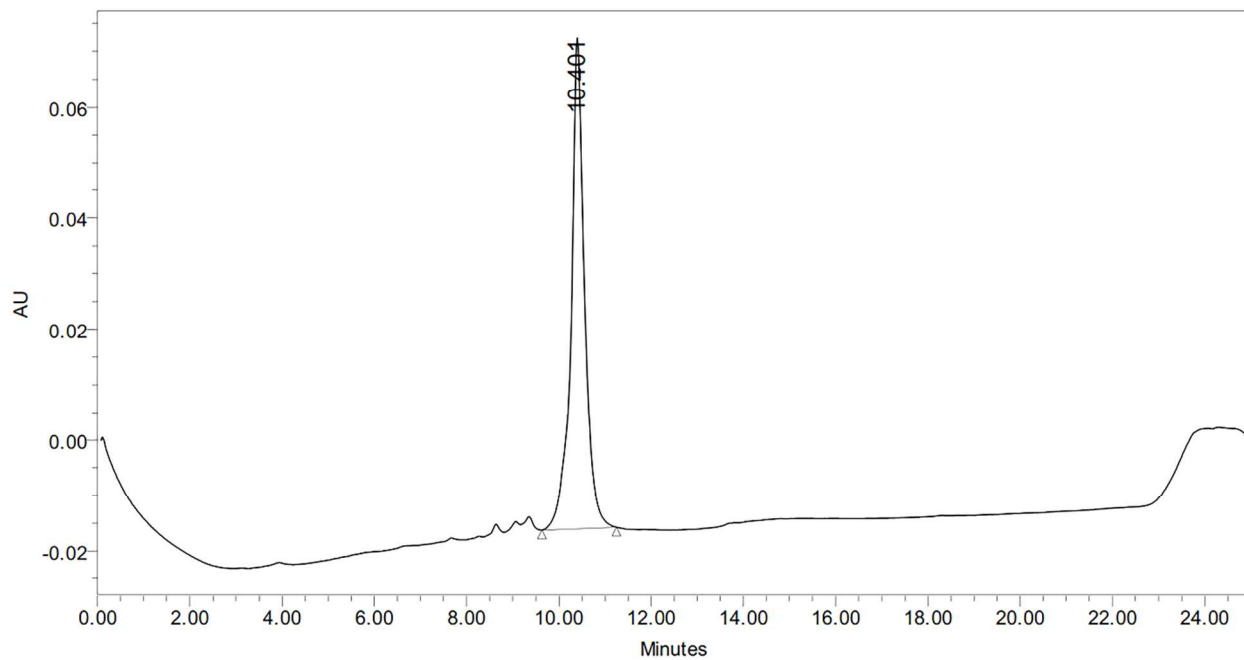

|   | RT    | % Area | Area<br>( $\mu\text{V}\cdot\text{sec}$ ) |
|---|-------|--------|------------------------------------------|
| 1 | 10.40 | 100.00 | 1797312                                  |

**Figure S7** RP IP HPLC ANALYSIS OF FL-GRP78A1 (260nm)

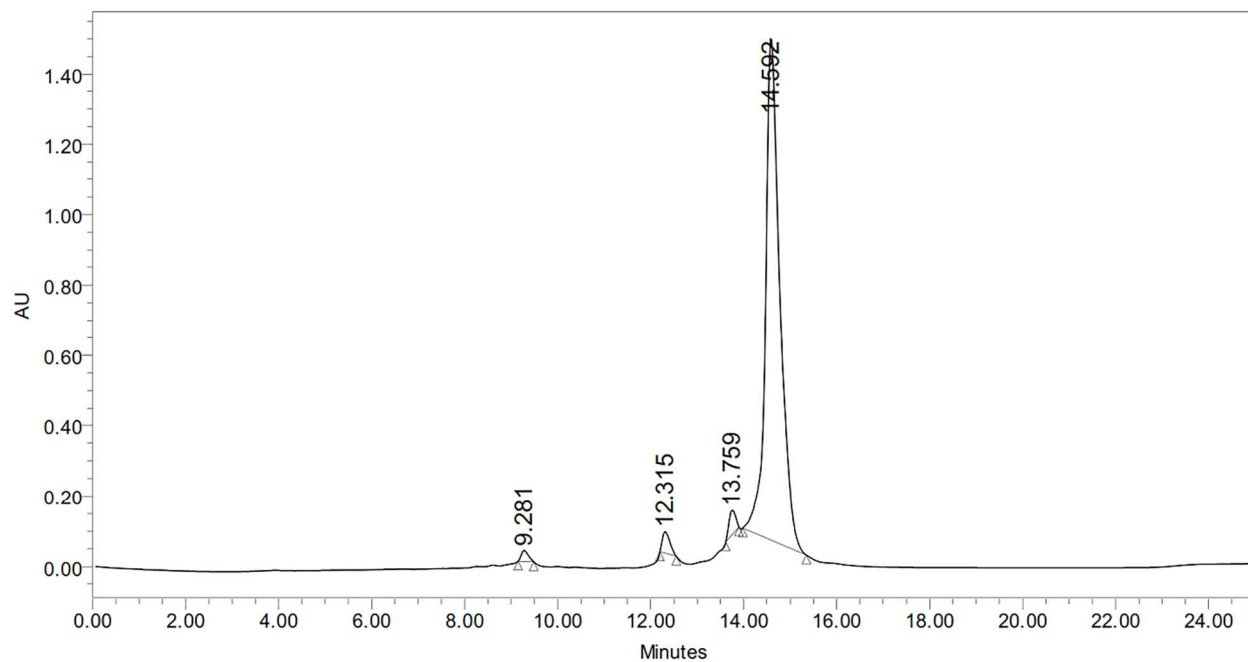

|   | RT    | % Area | Area ( $\mu\text{V}\cdot\text{sec}$ ) |
|---|-------|--------|---------------------------------------|
| 1 | 9.28  | 1.00   | 324879                                |
| 2 | 12.32 | 2.10   | 678728                                |
| 3 | 13.76 | 2.10   | 680619                                |
| 4 | 14.59 | 94.80  | 30706756                              |

**Figure S8** RP IP HPLC ANALYSIS OF FL-GRP78A1 (488nm)

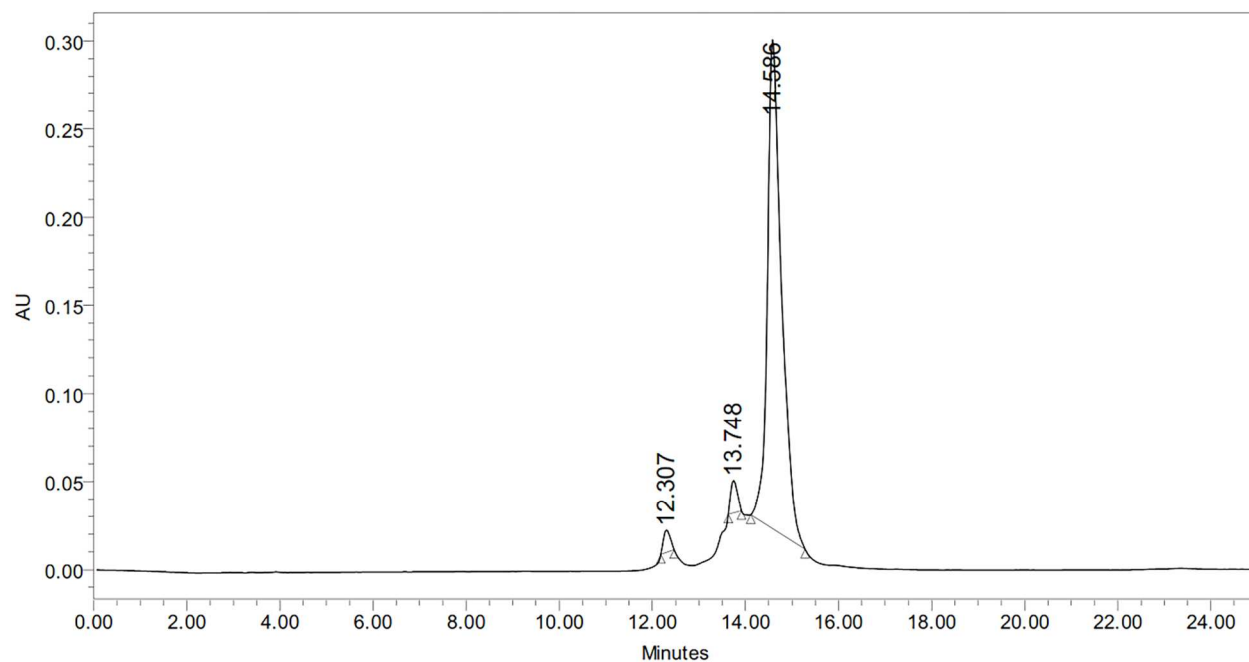

|   | RT    | % Area | Area<br>( $\mu\text{V}\cdot\text{sec}$ ) |
|---|-------|--------|------------------------------------------|
| 1 | 12.31 | 2.00   | 123746                                   |
| 2 | 13.75 | 2.95   | 181980                                   |
| 3 | 14.59 | 95.05  | 5866825                                  |

# Figure S9 ESI-MS ANALYSIS OF FL-GRP78A1

Deconvoluted Mass Spectrum of FITC-GRP78A1 (P1), RT = 0.141 min:

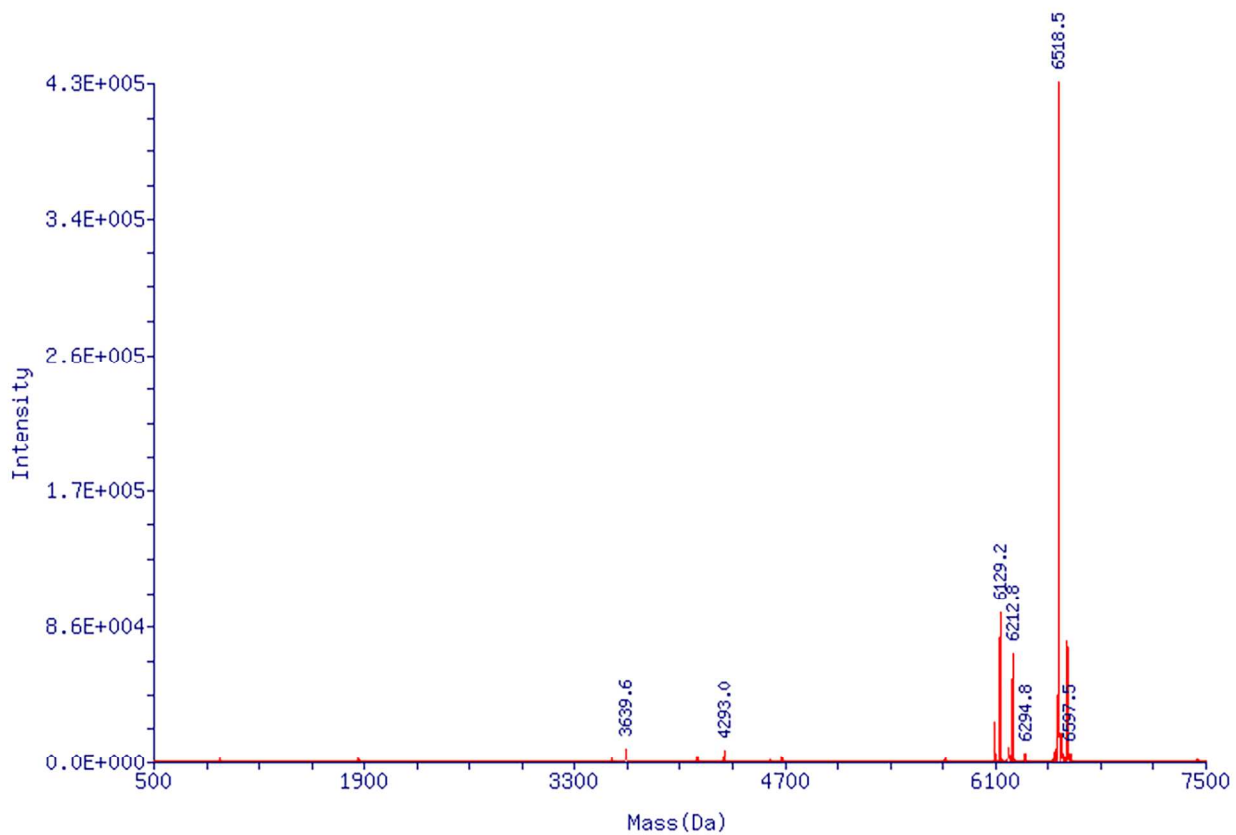

**Figure S10** RP IP HPLC ANALYSIS OF FL-GRP78S1 (260nm)

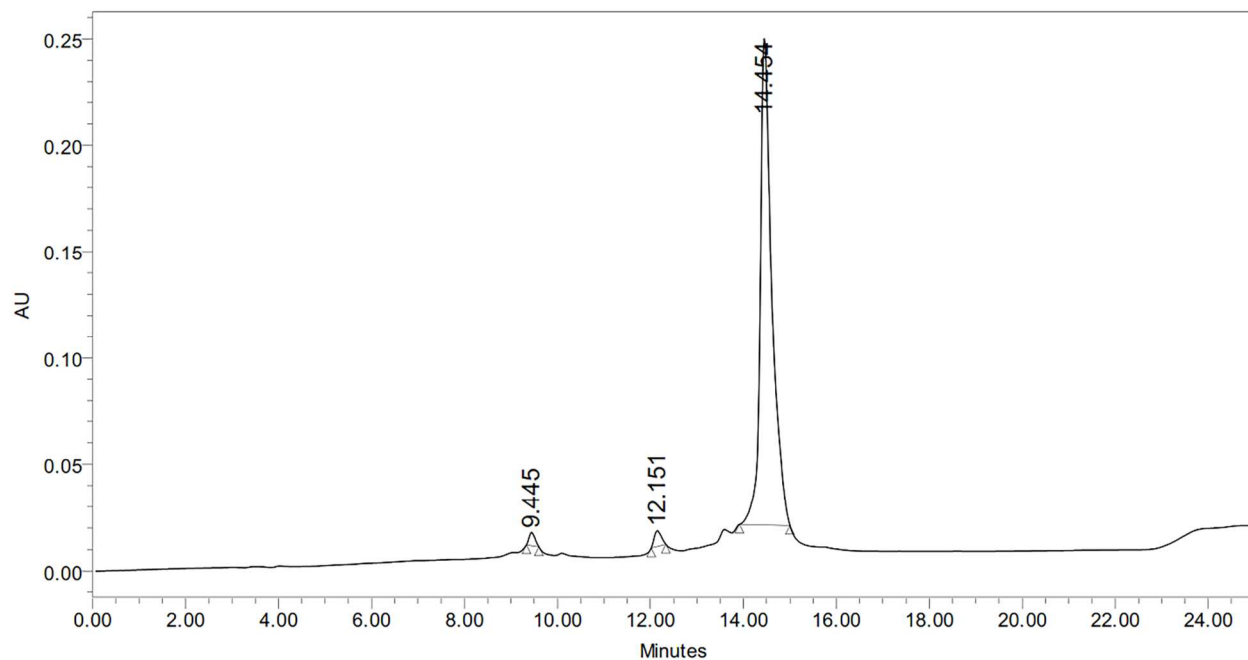

|   | RT    | % Area | Area<br>( $\mu\text{V}\cdot\text{sec}$ ) |
|---|-------|--------|------------------------------------------|
| 1 | 9.45  | 1.29   | 53177                                    |
| 2 | 12.15 | 1.86   | 76557                                    |
| 3 | 14.45 | 96.84  | 3981950                                  |

**Figure S11** RP IP HPLC ANALYSIS OF FL-GRP78S1 (488nm)

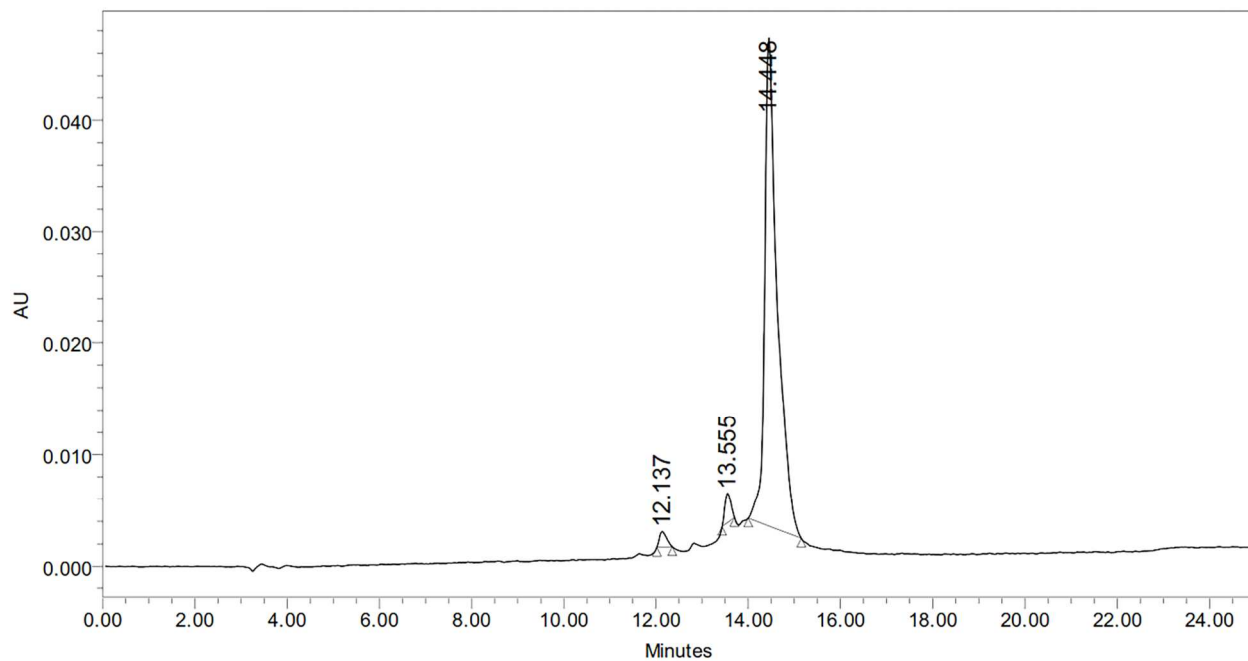

|   | RT    | % Area | Area<br>( $\mu\text{V}\cdot\text{sec}$ ) |
|---|-------|--------|------------------------------------------|
| 1 | 12.14 | 1.69   | 14785                                    |
| 2 | 13.56 | 2.70   | 23639                                    |
| 3 | 14.45 | 95.61  | 836278                                   |

# Figure S12 ESI-MS ANALYSIS OF FL-GRP78S1

Deconvoluted Mass Spectrum of FITC78s1, RT = 0.344 min:

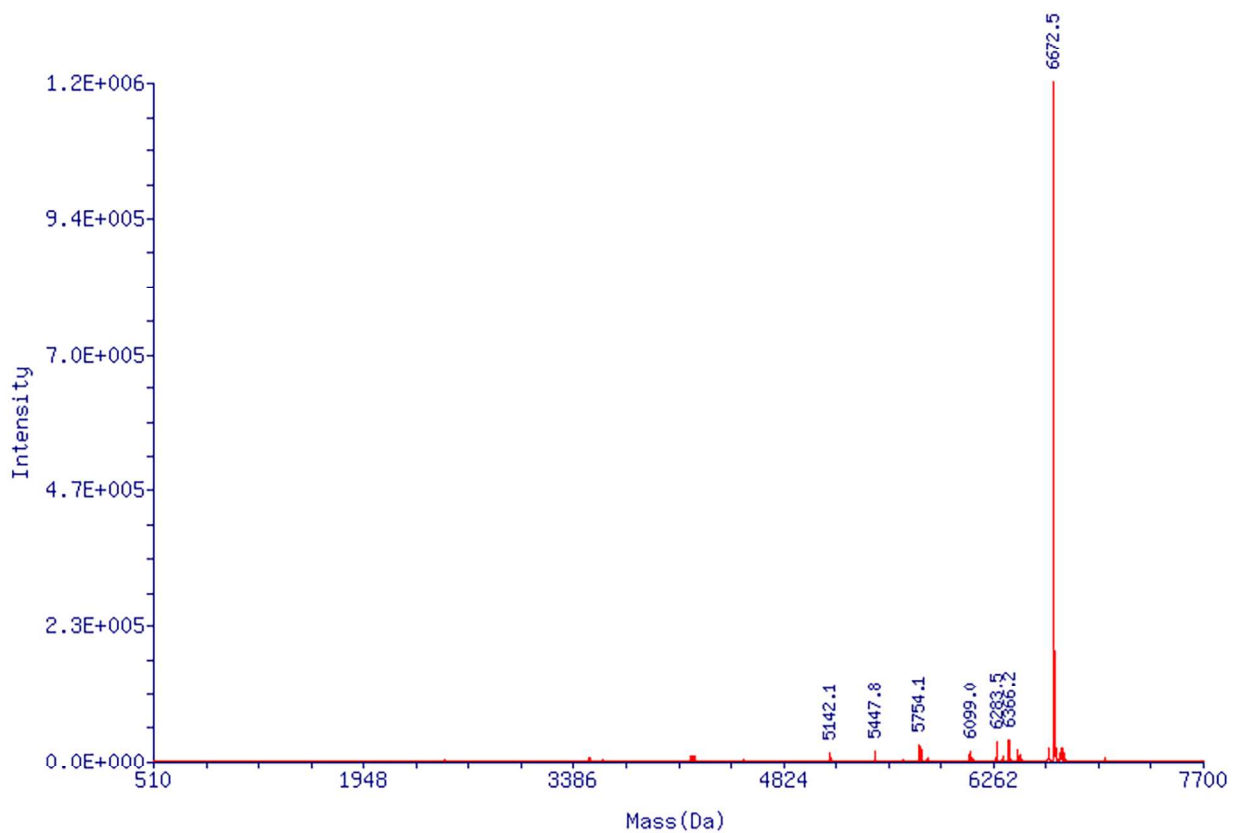

**Figure S13** RP IP HPLC ANALYSIS OF FL-GRP94S1 (260nm)

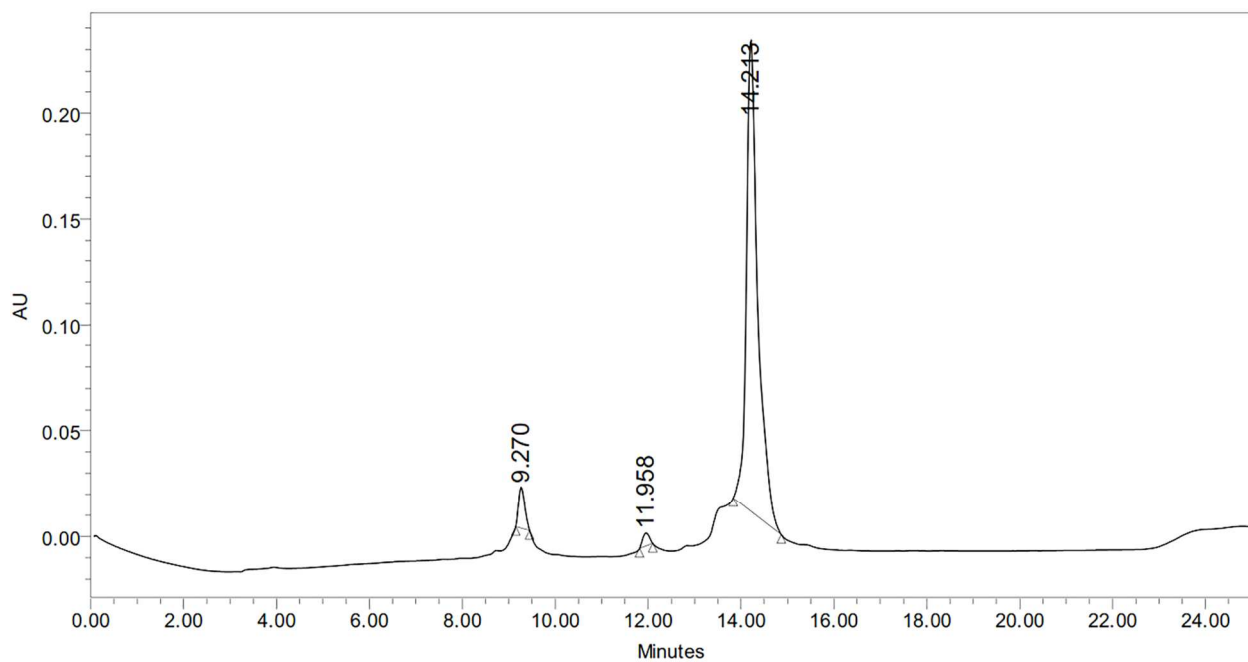

|   | RT    | % Area | Area<br>( $\mu\text{V}\cdot\text{sec}$ ) |
|---|-------|--------|------------------------------------------|
| 1 | 9.27  | 4.44   | 180347                                   |
| 2 | 11.96 | 1.47   | 59631                                    |
| 3 | 14.21 | 94.09  | 3818389                                  |



**Figure S14** ESI-MS ANALYSIS OF FL-GRP94S1

**Deconvoluted Mass Spectrum of FITC94s1, RT = 0.344 min:**

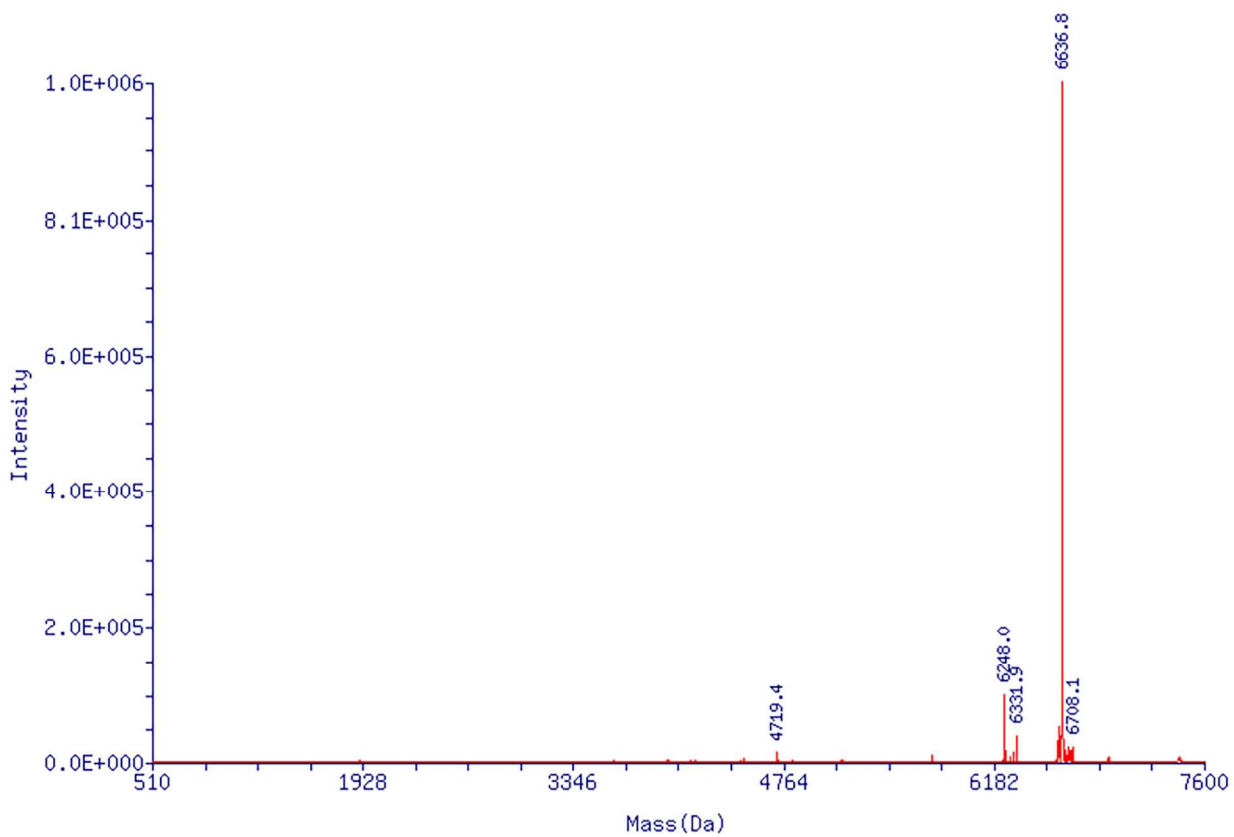

**Figure S15** RP IP HPLC ANALYSIS OF FL-V-GRP78A194A1 (260nm)

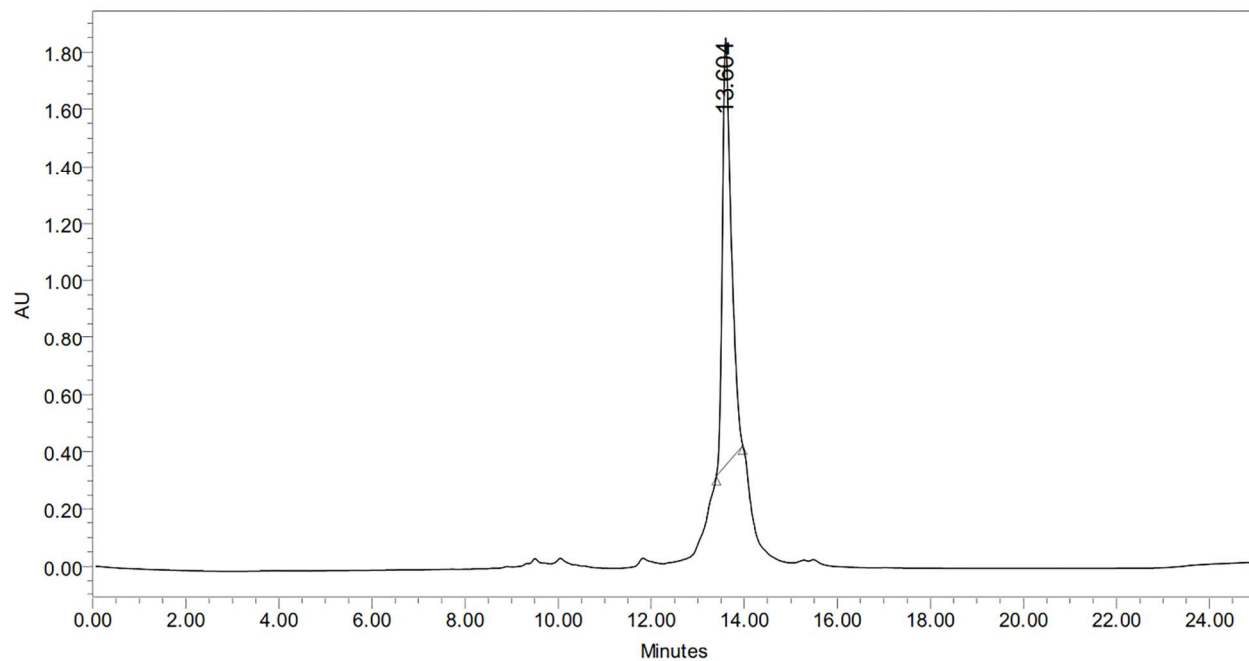

|   | RT    | % Area | Area<br>( $\mu\text{V}\cdot\text{sec}$ ) |
|---|-------|--------|------------------------------------------|
| 1 | 13.60 | 100.00 | 19780457                                 |

**Figure S16** RP IP HPLC ANALYSIS OF FL-V-GRP78A194A1 (488nm)

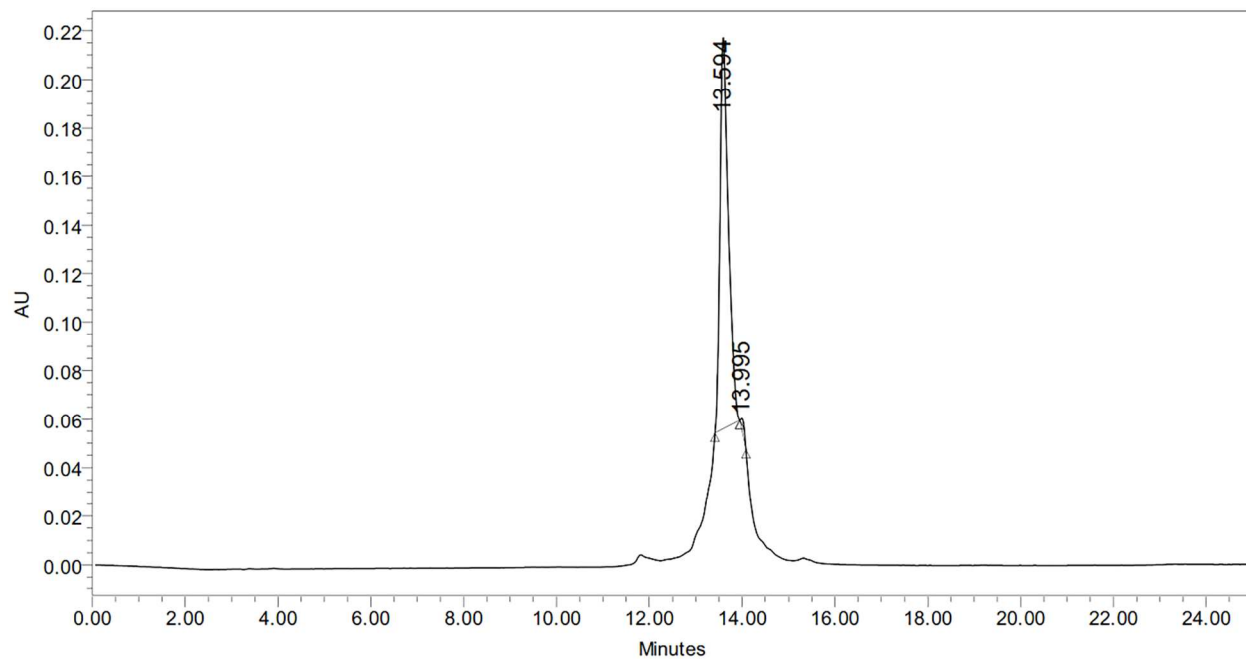

|   | RT    | % Area | Area<br>( $\mu\text{V}\cdot\text{sec}$ ) |
|---|-------|--------|------------------------------------------|
| 1 | 13.59 | 98.58  | 2031207                                  |
| 2 | 14.00 | 1.42   | 29335                                    |

**Figure S17** ESI-MS ANALYSIS OF FL-V-GRP78A194A1

Deconvoluted Mass Spectrum of 7894\_amino\_FITC, RT = 0.135 min:

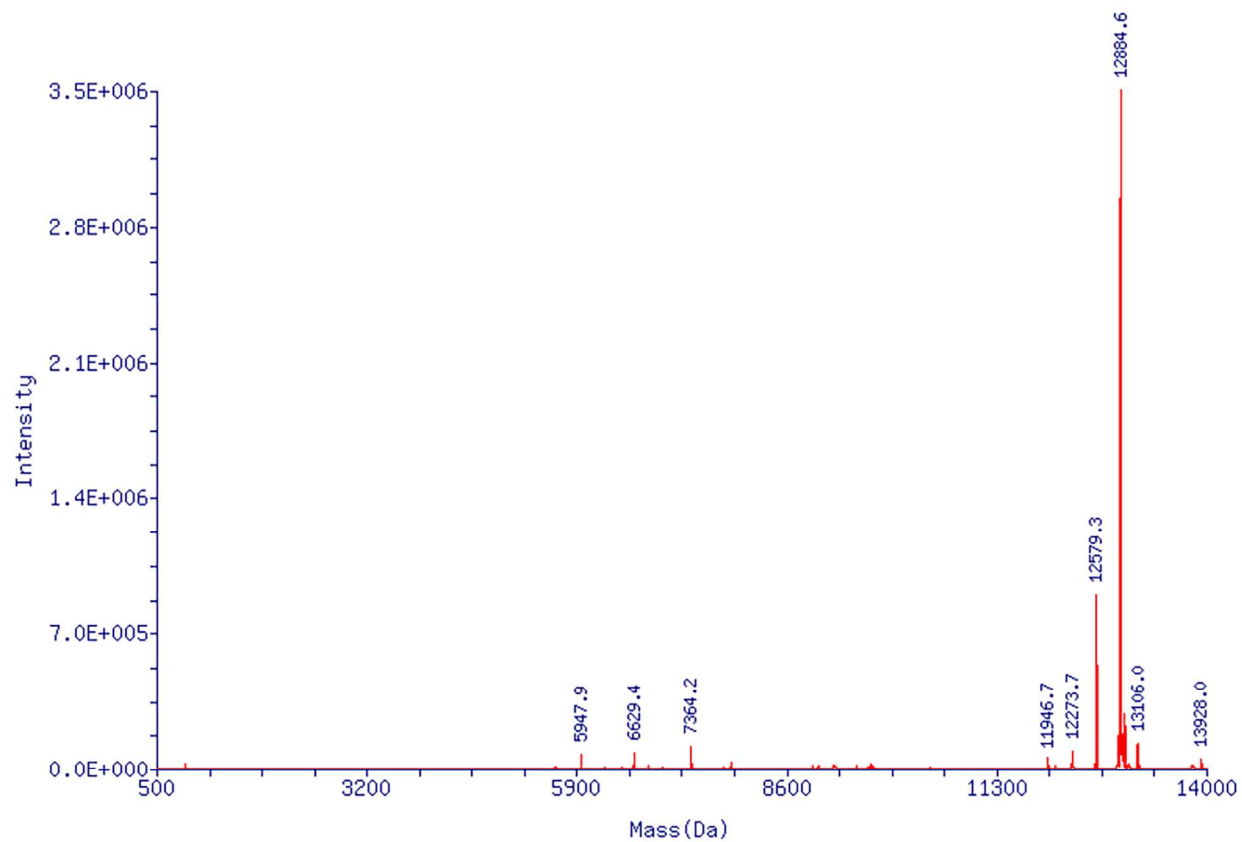

**Figure S18** RP IP HPLC ANALYSIS OF FL-V-GRP78A178A2 (488nm)

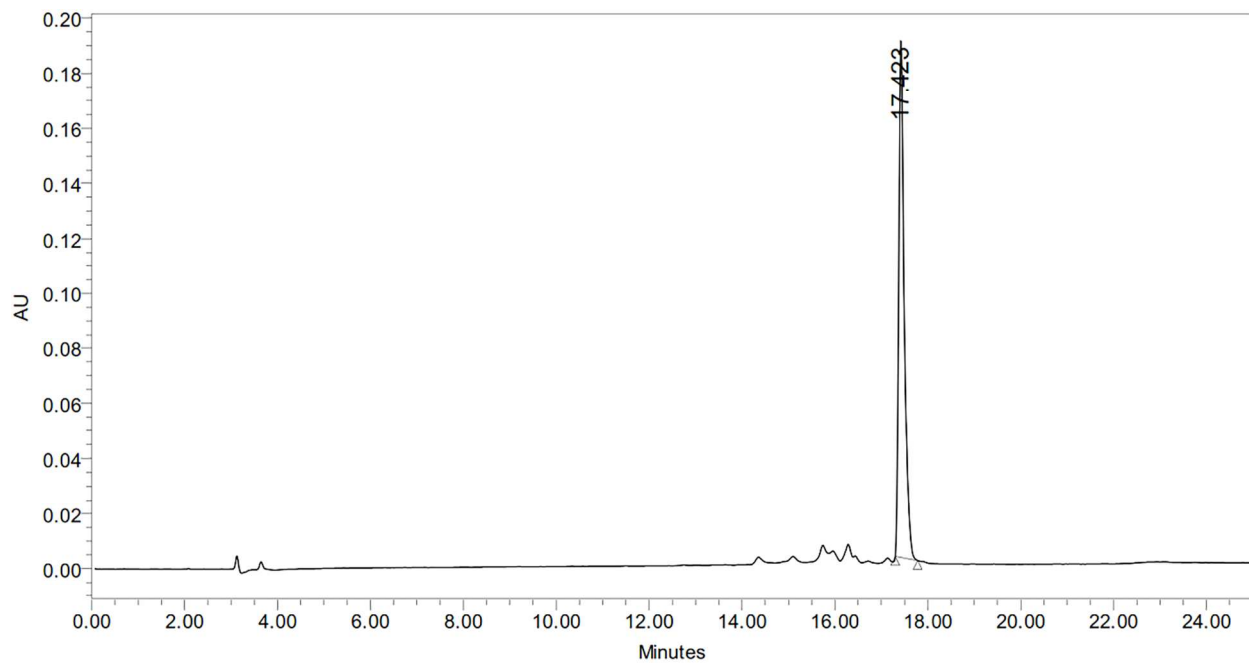

|   | RT    | % Area | Area<br>( $\mu\text{V}\cdot\text{sec}$ ) |
|---|-------|--------|------------------------------------------|
| 1 | 17.42 | 100.00 | 1533861                                  |

**Figure S19** ESI-MS ANALYSIS OF FL-V-GRP78A178A2

Deconvoluted Mass Spectrum of 78a1a2\_amino\_FITC, RT = 0.125 min:

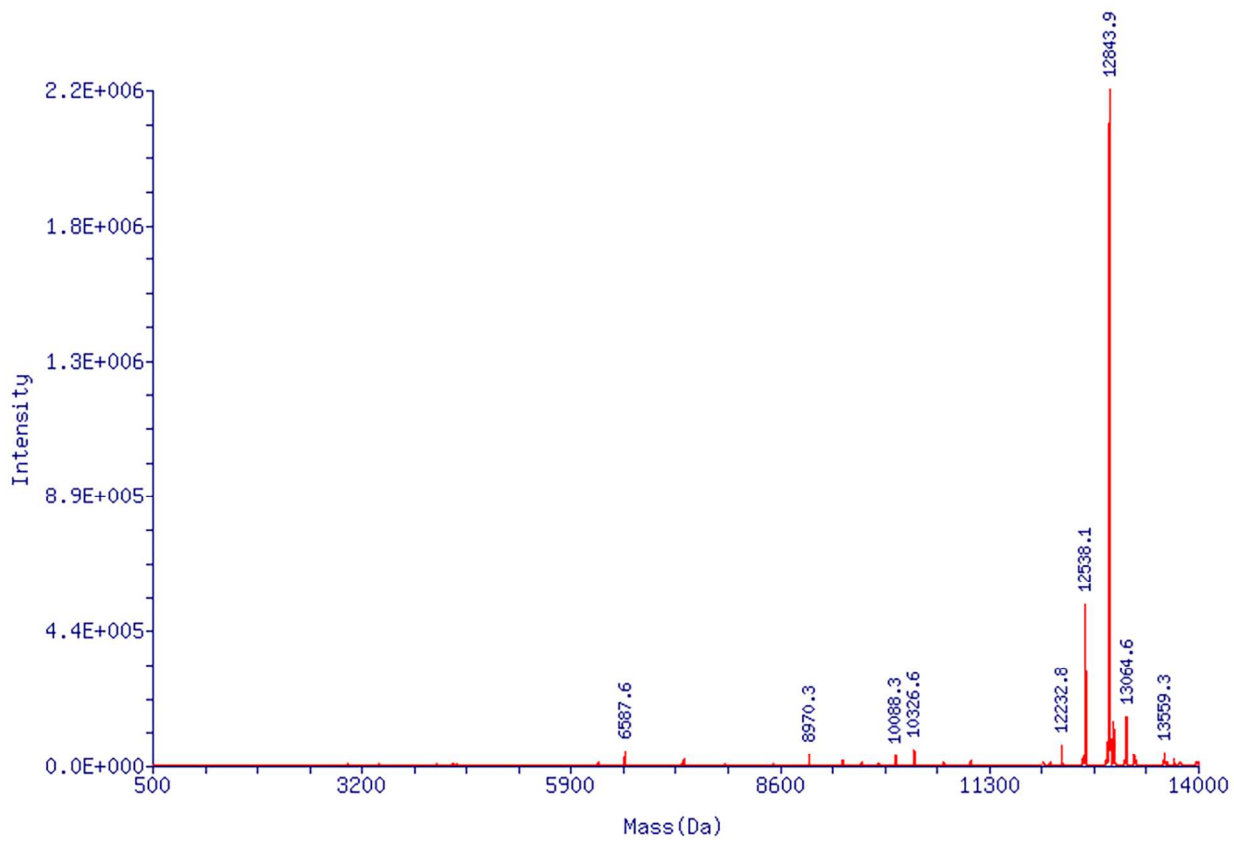

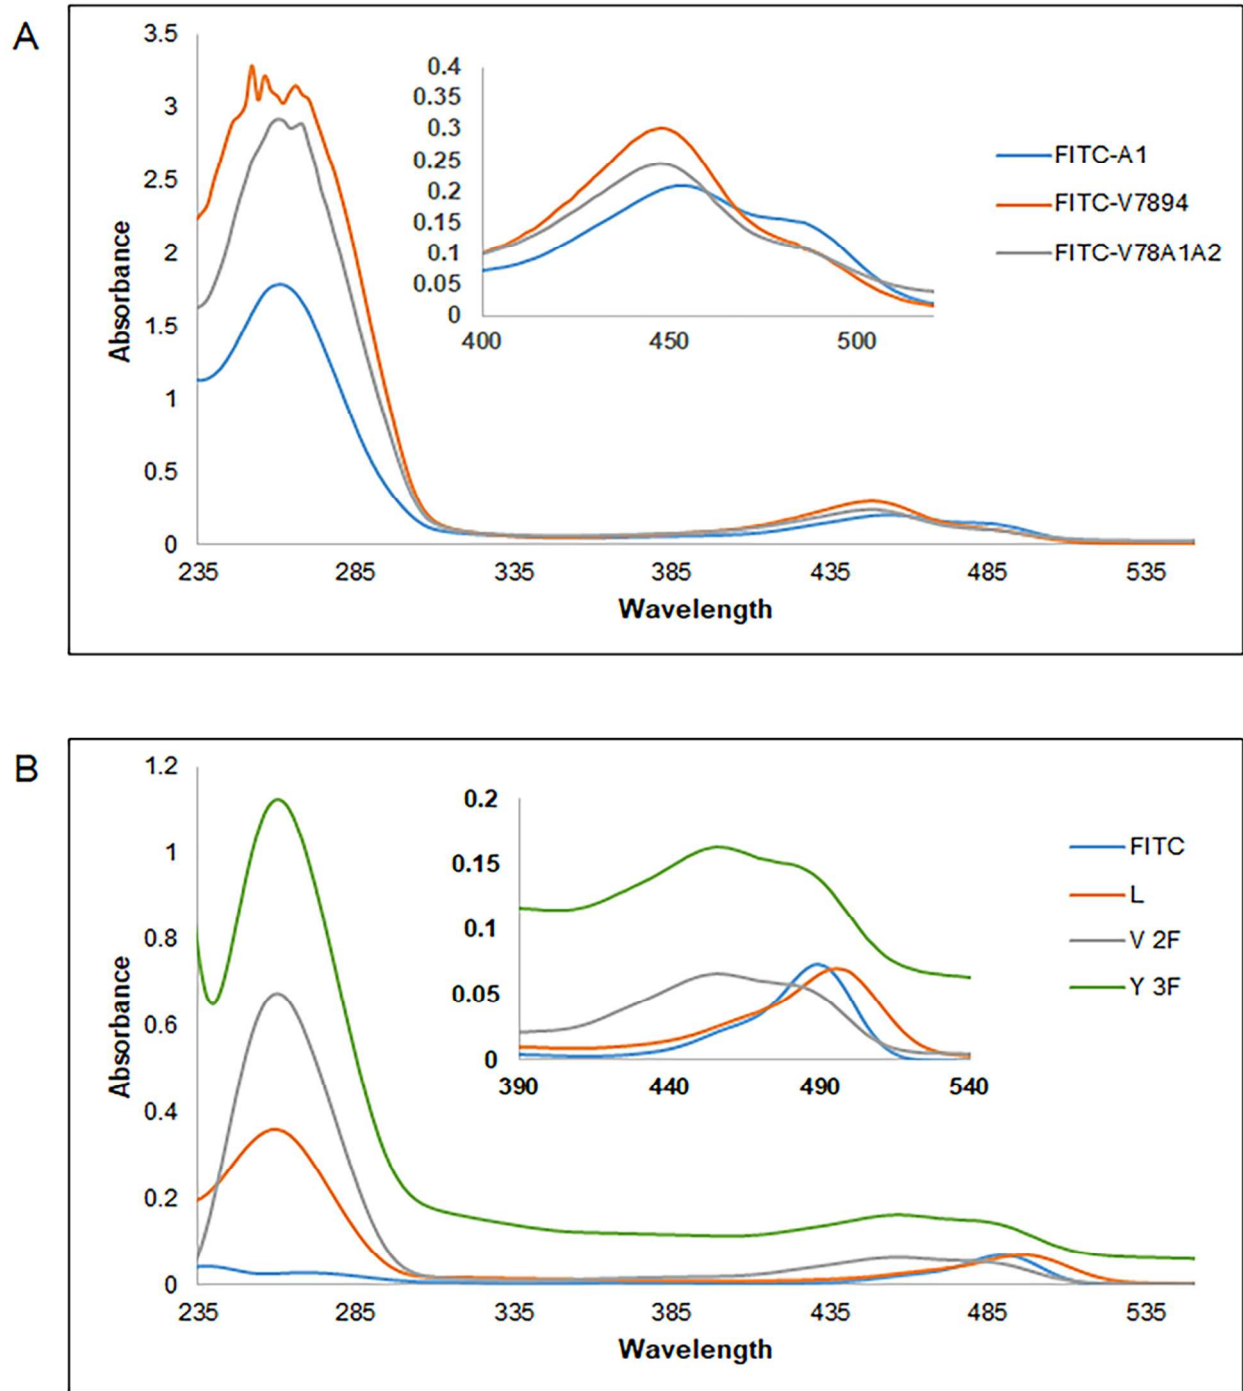

**Figure S20** UV absorption spectra of FITC-labeled template siRNAs (**A**) and multi-FITC siRNAs (**B**). All siRNA hybrids were prepared in annealing buffer (1.25  $\mu$ M, 10 mM Tris, 50 mM NaCl, 1 mM EDTA, pH 7.5 – 8.0).

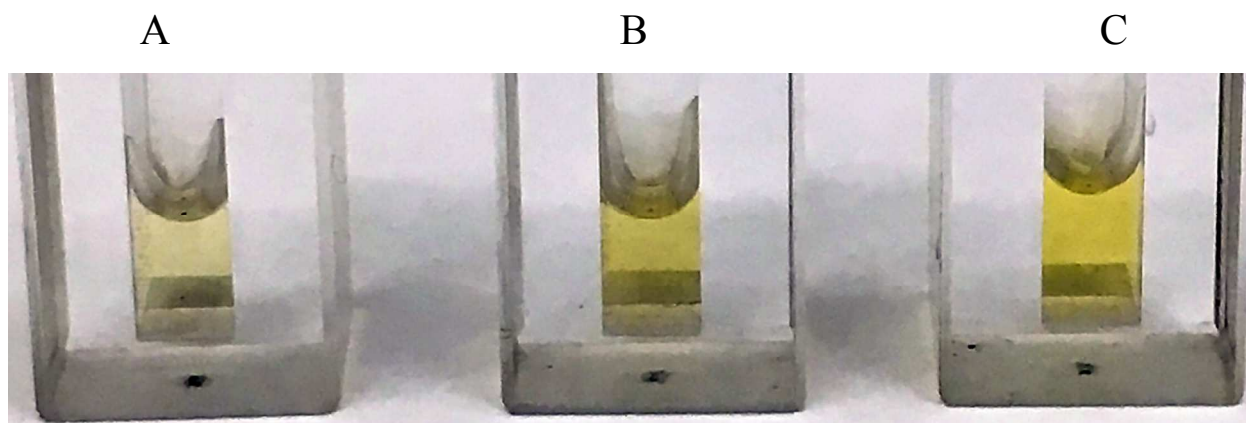

**Figure S21** Multi-FITC siRNA samples pre-dilution for fluorescence spectroscopy analysis. Linear 78A1:FL-78S1 (A), V-78A194A1:FL-78S1FL-94S1 (B) and Y78A194A175A1:FL-78S1FL-94S1FL-75S1 (C). siRNA hybrids were prepared in annealing buffer (1.25  $\mu$ M, 10 mM Tris, 50 mM NaCl, 1 mM EDTA, pH 7.5 – 8.0).



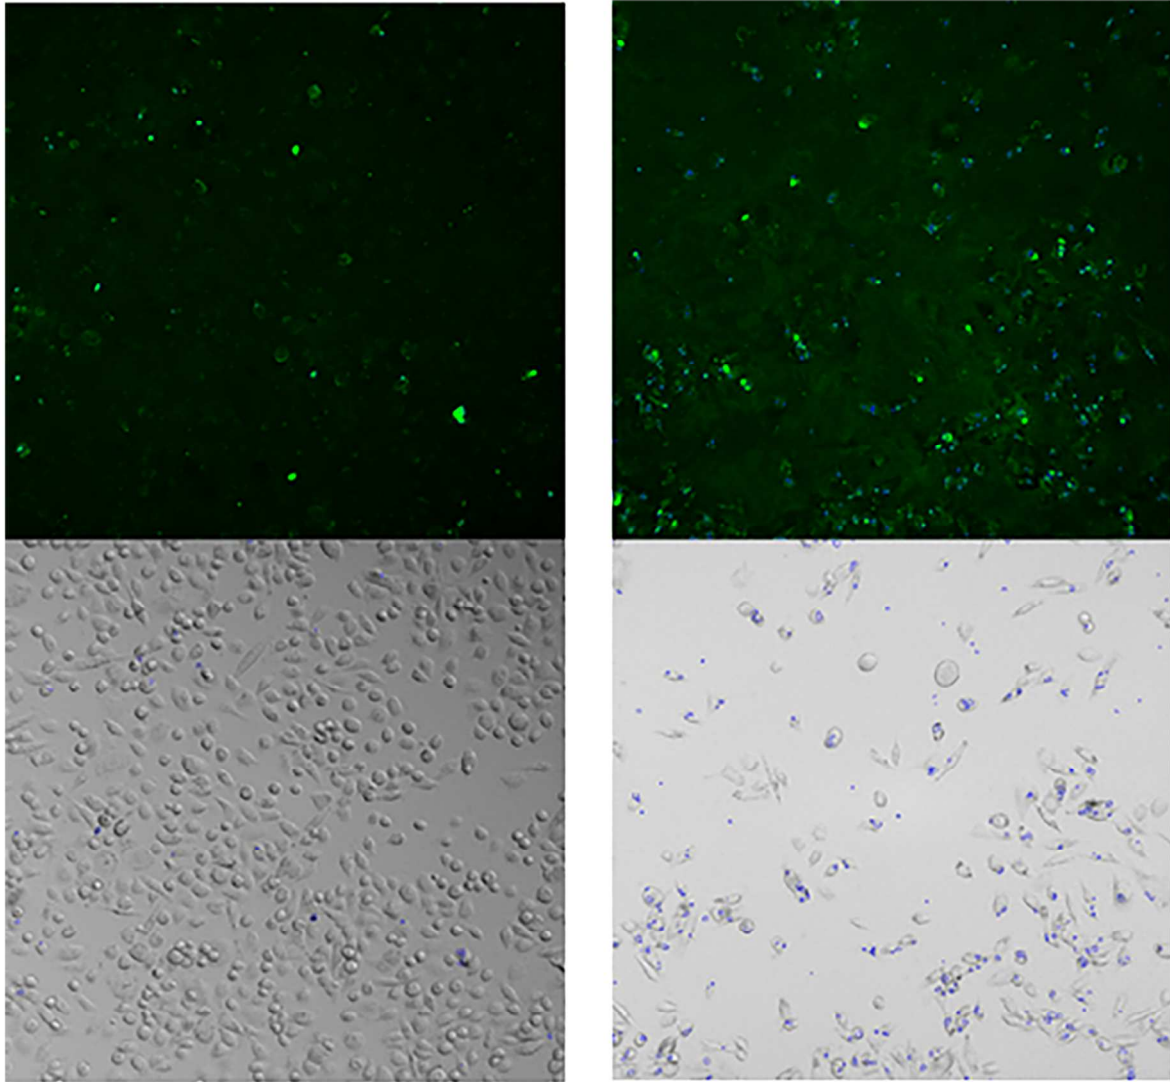

V-FL-siRNA

4 hours post transfection

24 hours post transfection

**Figure S22** Fluorescent microscope images of PC-3 cells treated with V-shape FITC-siRNA containing 2 FITC probes 4 and 24 hours post transfection.

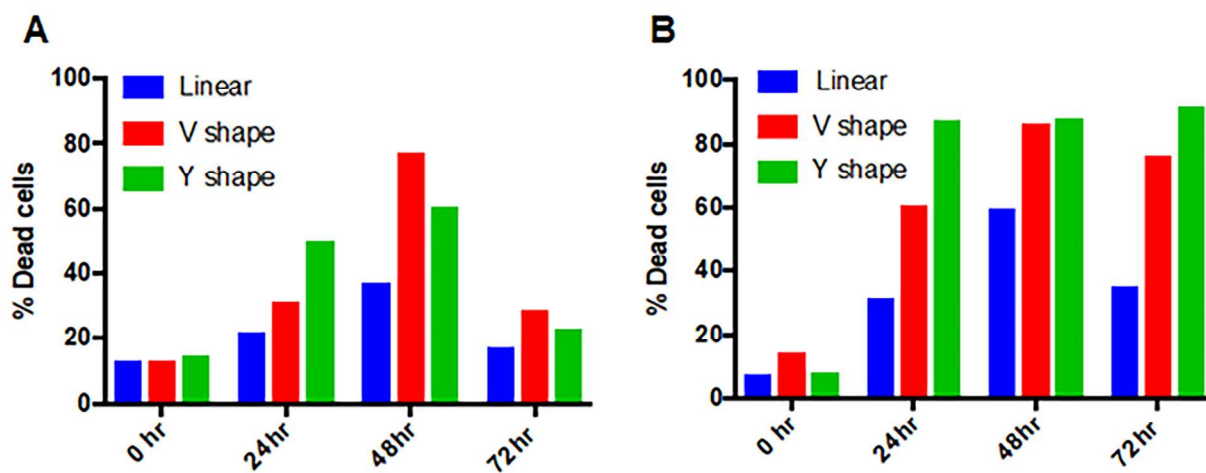

**Figure S23** Cell viability determined using PI on flow cytometry, adhered cells (A) and supernatant cells (B). After 24, 48 and 72 h, the supernatant was collected, and the remaining cells were removed using trypsin. Cell samples were pelleted and re-suspended in 1% BSA in PBS (1 mL) and stained using PI according the manufacturer's recommendation.
